# Supplementary material
Source: PubMed Central journal article supplement (PMC3955978)
Supplement: Supp_Fig2.pdf [file Supp_Fig2.pdf]

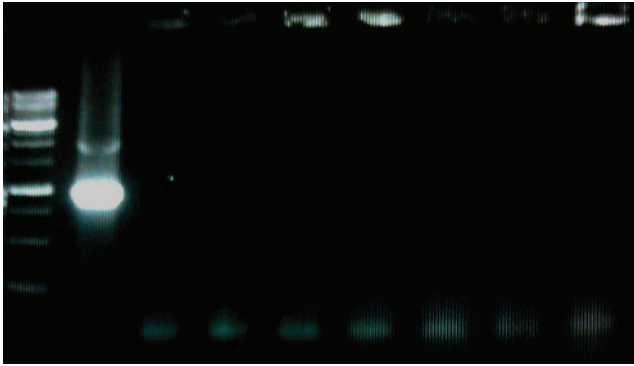

**SUPPLEMENTARY FIG. S2.** Electrophoretic screening of TNF- $\alpha$ -positive colony. 1 kb ladder and 825 bp CD40L product. TNF- $\alpha$ , tumor necrosis factor- $\alpha$ .
