# Supplementary material
Source: PubMed Central journal article supplement (PMC3955978)
Supplement: Supp_Table1.pdf [file Supp_Table1.pdf]

SUPPLEMENTARY TABLE S1. CLASSIFICATION OF TESTS AND CONTROL GROUPS

| <i>MSC groups</i>                              | <i>DC + MSC “sup”<br/>groups (soluble factors)</i> | <i>DC + MSC “con”<br/>groups (cell–cell contact)</i> | <i>Control groups</i>                                                                                                                               |
|------------------------------------------------|----------------------------------------------------|------------------------------------------------------|-----------------------------------------------------------------------------------------------------------------------------------------------------|
| <i>In vivo</i>                                 | <i>In vitro and in vivo</i>                        | <i>In vitro and in vivo</i>                          | <i>In vitro and in vivo</i>                                                                                                                         |
| TNF- $\alpha$<br>CD40L<br>TNF- $\alpha$ /CD40L | TNF- $\alpha$<br>CD40L<br>TNF- $\alpha$ /CD40L     | TNF- $\alpha$<br>CD40L<br>TNF- $\alpha$ /CD40L       | iDCs (negative external control)<br>LPS-DCs (positive external control)<br>Empty vector-MSCs (internal control)<br>Untreated (just <i>in vivo</i> ) |

CD40L, CD40 ligand; con, contact; DCs, dendritic cells; iDCs, immature DCs; LPS, lipopolysaccharide; MSCs, mesenchymal stem cells; sup, supernatant; TNF- $\alpha$ , tumor necrosis factor- $\alpha$ .
