# Supplementary material
Source: PubMed Central journal article supplement (PMC3955978)

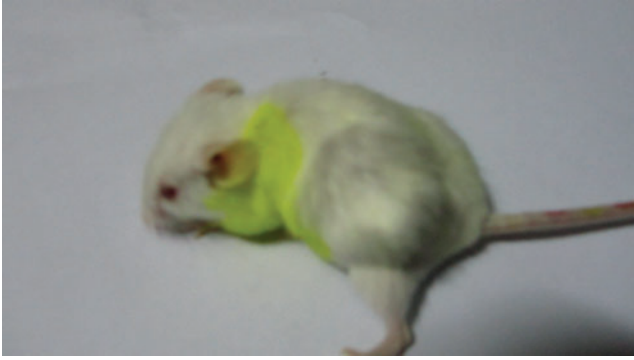

**SUPPLEMENTARY FIG. S4.** Tumor-induced BALB/c mice.

Supplement: Supp_Fig4.pdf [file Supp_Fig4.pdf]

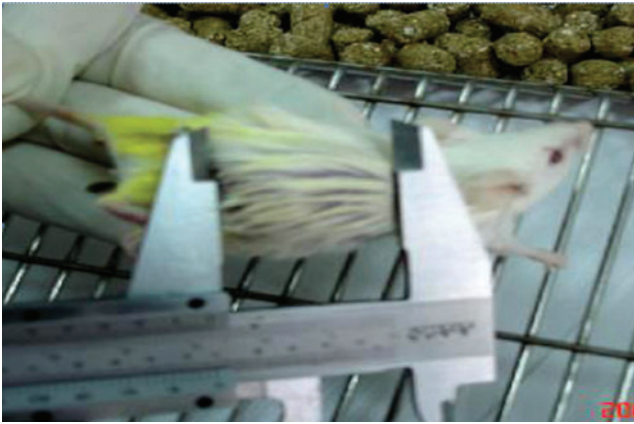

**SUPPLEMENTARY FIG. S5.** Periodic tumor measurement.

Supplement: Supp_Fig5.pdf [file Supp_Fig5.pdf]
